# Supplementary material for: Packaging Solutions to Extend the Shelf Life of Green Asparagus (Asparagus officinalis L.) ‘Vegalim’
Source: MDPI journal article supplement (doi:10.3390/foods10020478), 2021-02-22
Supplement: s1 [file s1]

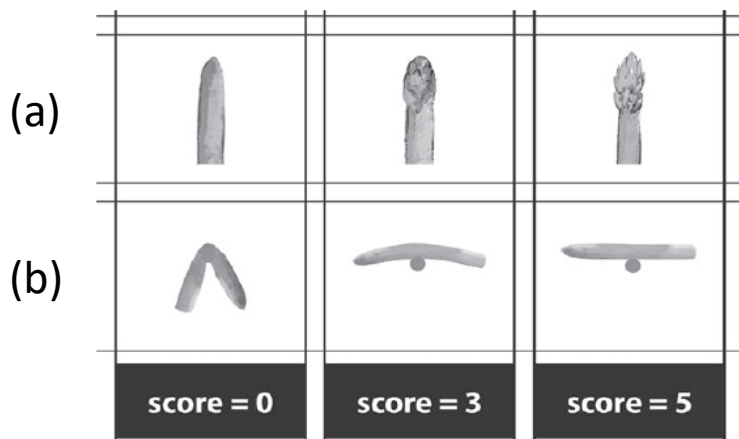

Visual references for evaluation of descriptors: (a) 'artichoke-shaped tip' and (b) 'firmness' [11]

ARTICHOKE-SHAPED TIP: 0 ☐ 3 ☐ 5 ☐

FIRMNESS: 0 ☐ 3 ☐ 5 ☐

Sign according the following scale:

'absence' (0), 'very weak' (1), 'weak' (2), 'medium' (3), 'intense' (4) and 'very intense' (5)

|                     |   |   |   |   |   |   |
|---------------------|---|---|---|---|---|---|
| COLOUR              | 0 | 1 | 2 | 3 | 4 | 5 |
| TURGIDITY           | 0 | 1 | 2 | 3 | 4 | 5 |
| MOULDS              | 0 | 1 | 2 | 3 | 4 | 5 |
| OFF-ODOURS          | 0 | 1 | 2 | 3 | 4 | 5 |
| ODOURS              | 0 | 1 | 2 | 3 | 4 | 5 |
| TOTAL ACCEPTABILITY | 0 | 1 | 2 | 3 | 4 | 5 |
